# Supplementary material
Source: PubMed Central journal article supplement (PMC4248833)
Supplement: JB.02129-14_zjb999093369so1.pdf [file JB.02129-14_zjb999093369so1.pdf]

Supplementary Information to:

Evolution of Dual Transcription Repression of a Putative Efflux System and of Global Control of the Integrative and Conjugative Element *ICE<sub>clc</sub>* by the TetR-type MfsR Protein

Nicolas Pradervand, François Delavat, Sandra Sulser, Ryo Miyazaki<sup>+</sup>, Jan Roelof van der Meer\*

Department of Fundamental Microbiology, University of Lausanne, 1015 Lausanne, Switzerland

\*Corresponding author:

J. R. van der Meer, Department of Fundamental Microbiology, Bâtiment Biophore, Quartier UNIL Sorge, 1015 Lausanne, Switzerland

Email: [janroelof.vandermeer@unil.ch](mailto:janroelof.vandermeer@unil.ch)

Supplementary Figures S1-S4

Supplementary Tables S1-S4

MfsA (OprM/NodT)

MfsB (EmrB)

MfsC (HlyD / EmrK)

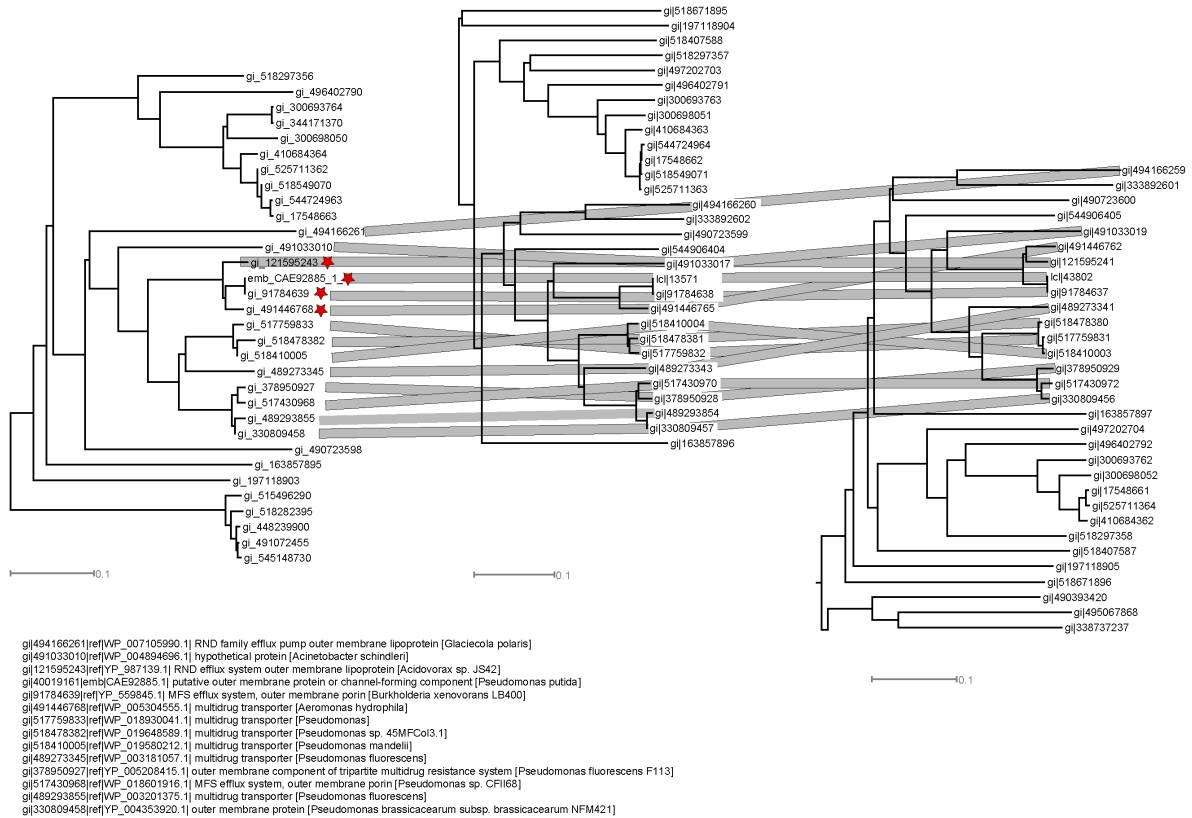

**FIG S1** Phylogenetic trees of major superfamily facilitator tripartite protein subunits, outer membrane component (MfsA, OprM), multiple drug resistance efflux pump (MfsB, EmrB) and membrane fusion protein component MfsC (HlyB, EmrK), from a variety of closely related systems in *Gammaproteobacteria*. Tree tips indicate protein reference numbers, whereas corresponding organism names are displayed below the graphs. Thick grey lines relate the three MFS components of individual systems across the different trees. Those having red asterisks point to MFS systems present on mobile integrative DNA elements such as ICE*Ecl*, suggesting their coherent and separate branching. Trees produced by using Clustal Omega ([www.ebi.org](http://www.ebi.org)) on a COBALT alignment of BlastP hits to MfsA, MfsB and MfsC of ICE*Ecl*, displayed using Dendroscope.



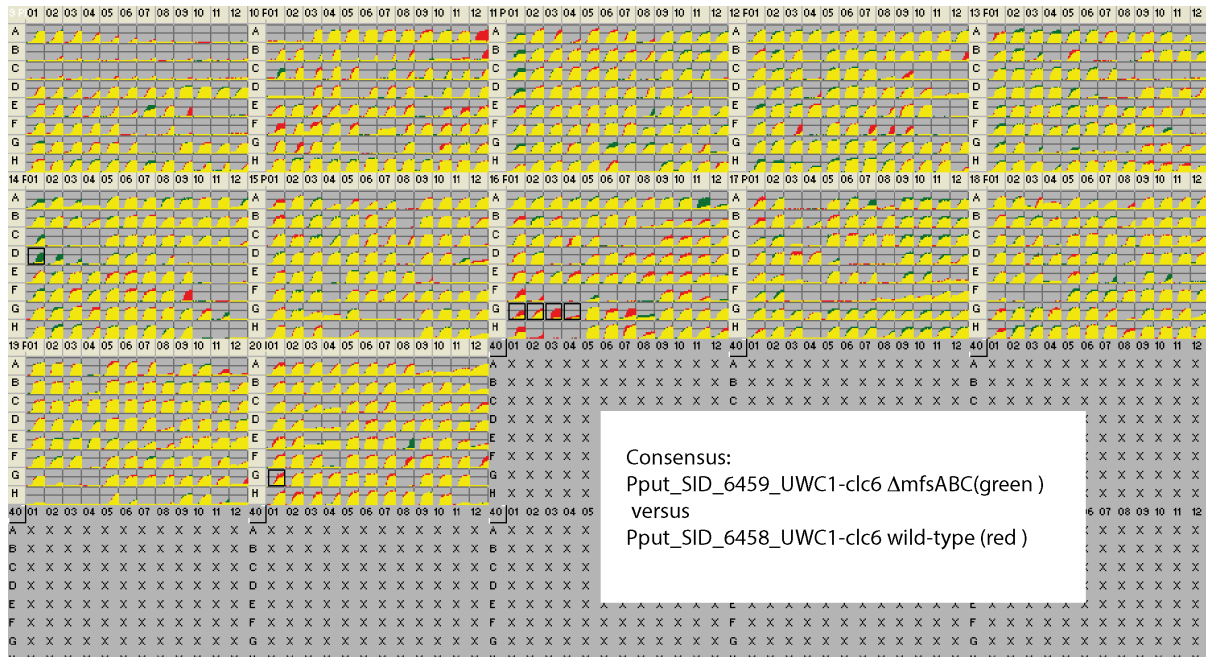

**FIG S3** Consensus respiratory profiles from duplicate experiments in BIOLOG PM plates PM09-PM20, testing different chemical sensitivities of *P. putida* UWC1 (*ICEclc-ΔmfsABC*), in green, versus *P. putida* UWC1 (*ICEclc*), in red. Yellow profiles show overlap between the profiles of both strains. Black squares point to consistently different behaviour in both replicates.

Phenotypes Gained by *P. putida* UWC1 (*ICEclc-ΔmfsABC*):

PM14A D01 107 Cadmium chloride toxic cation

Phenotypes Lost by *P. putida* UWC1 (*ICEclc-ΔmfsABC*):

PM20B G01 -64 Captan fungicide, carbamate

PM16A G01,G02,G03,G04 -303 Chromium (III) chloride toxic cation



Table S1. Strains used in this study.

| Strain                      | Plasmid or Genotype              | Characteristics                                                       | Reference or source | Lab collection strain number | Primers used to amplify gene fragment (s)                                                |
|-----------------------------|----------------------------------|-----------------------------------------------------------------------|---------------------|------------------------------|------------------------------------------------------------------------------------------|
| <i>E. coli</i> BL21 (DE3)   | pET22b(+)- <i>mfsR-His6</i>      | Overexpression of MfsR                                                | this study          | 3787                         | 110705 + 110706                                                                          |
| <i>E. coli</i> DH5 $\alpha$ | pGEM-T-easy-P <sub>mfsR-1</sub>  | Promoter region of <i>mfsR</i>                                        | this study          | 4453                         | 120824 + 120825                                                                          |
| <i>E. coli</i> DH5 $\alpha$ | pGEM-T-easy-P <sub>mfsR-2</sub>  | Promoter region of <i>mfsR</i>                                        | this study          | 4454                         | 120826 + 120827                                                                          |
| <i>E. coli</i> DH5 $\alpha$ | pGEM-T-easy-P <sub>mfsR-3</sub>  | Promoter region of <i>mfsR</i>                                        | this study          | 4455                         | 120828 + 120829                                                                          |
| <i>E. coli</i> DH5 $\alpha$ | pGEM-T-easy-P <sub>mfsR-4</sub>  | Promoter region of <i>mfsR</i>                                        | this study          | 4456                         | 120830 + 120831                                                                          |
| <i>E. coli</i> DH5 $\alpha$ | pGEM-T-easy-P <sub>mfsR-5</sub>  | Promoter region of <i>mfsR</i>                                        | this study          | 4457                         | 120832 + 120833                                                                          |
| <i>E. coli</i> DH5 $\alpha$ | pGEM-T-easy-P <sub>mfsR-6</sub>  | Promoter region of <i>mfsR</i>                                        | this study          | 4458                         | 120824 + 100210                                                                          |
| <i>E. coli</i> DH5 $\alpha$ | pGEM-T-easy-P <sub>mfsR-7</sub>  | Promoter region of <i>mfsR</i>                                        | this study          | 4459                         | 121106 + 121107                                                                          |
| <i>E. coli</i> DH5 $\alpha$ | pGEM-T-easy-P <sub>mfsR-8</sub>  | Promoter region of <i>mfsR</i>                                        | this study          | 4460                         | 121107 + 121109<br>for the fusion: 121211 + 121212                                       |
| <i>E. coli</i> DH5 $\alpha$ | pGEM-T-easy-P <sub>mfsR-9</sub>  | Promoter region of <i>mfsR</i> . OP1 region replaced by <i>XhoI</i> . | this study          | 4461                         | 121106+121107 <i>XhoI</i> -ligated with 121108+121109<br>for the fusion: 121211 + 121212 |
| <i>E. coli</i> DH5 $\alpha$ | pGEM-T-easy-P <sub>mfsR-10</sub> | Promoter region of <i>mfsR</i>                                        | this study          | 4462                         | 121108 + 121109                                                                          |
| <i>E. coli</i> DH5 $\alpha$ | pGEM-T-easy-P <sub>mfsR-11</sub> | Promoter region of <i>mfsR</i>                                        | this study          | 3859                         | 121211 + 121213                                                                          |
| <i>E. coli</i> DH5 $\alpha$ | pGEM-T-easy-P <sub>mfsA-1</sub>  | Promoter region of <i>mfsA</i>                                        | this study          | 4463                         | 120513 + 121105                                                                          |
| <i>E. coli</i> DH5 $\alpha$ | pGEM-T-easy-P <sub>mfsA-2</sub>  | Promoter region of <i>mfsA</i>                                        | this study          | 4464                         | 121104 + 120512                                                                          |
| <i>E. coli</i> DH5 $\alpha$ | pGEM-T-easy-P <sub>mfsA-3</sub>  | Promoter region of <i>mfsA</i>                                        | this study          | 4465                         | 121102 + 120512 for the fusion : 121214 + 120512                                         |
| <i>E. coli</i> DH5 $\alpha$ | pGEM-T-easy-P <sub>mfsA-4</sub>  | Promoter region of <i>mfsA</i>                                        | this study          | 4466                         | 121102 + 121103                                                                          |
| <i>E. coli</i> DH5 $\alpha$ | pGEM-T-easy-P <sub>mfsA-5</sub>  | Promoter region of <i>mfsA</i>                                        | this study          | 4467                         | 121104 + 121103                                                                          |
| <i>E. coli</i> DH5 $\alpha$ | pGEM-T-easy-P <sub>mfsA-6</sub>  | Promoter region of <i>mfsA</i>                                        | this study          | 3918                         | 120513 + 120512                                                                          |

|                             |                                                                                                                       |                                                                                                                 |            |           |                                  |
|-----------------------------|-----------------------------------------------------------------------------------------------------------------------|-----------------------------------------------------------------------------------------------------------------|------------|-----------|----------------------------------|
| <i>E. coli</i> DH5 $\alpha$ | pGEM-T-easy-P <sub>85934-88400</sub>                                                                                  | Contains promoter region of ICE <i>clc</i> P <sub>85934-88400</sub>                                             | this study | 4000      | 120203 + 120204                  |
| <i>P. putida</i> UWC1       | wild-type                                                                                                             | Plasmid-less derivative of <i>P. putida</i> mt-2 (TOL), used as recipient for ICE <i>clc</i> , Rif <sup>R</sup> | (1)        | 1291      |                                  |
| <i>P. putida</i> UWC1       | mini-Tn7- <i>mfsR</i>                                                                                                 | 1291-derivative with integrated single copy mini-Tn7- <i>mfsR</i> , Gm <sup>R</sup>                             | (2)        | 4301      | 100208 + 120222                  |
| <i>P. putida</i> UWC1       | ICE <i>clc</i> wt                                                                                                     | One copy of ICE <i>clc</i> integrated in <i>tRNA<sup>Gly</sup></i> -gene #5                                     | (3)        | 2737      |                                  |
| <i>P. putida</i> UWC1       | ICE <i>clc</i> - $\Delta$ <i>mfsR</i> (- $\Delta$ ' <i>marR</i> )                                                     | 2737-derivative with a deletion in <i>mfsR</i> plus small part of <i>orf17984</i> .                             | (2)        | 3543      | 101105 + 101106, 101107 + 101108 |
| <i>P. putida</i> UWC1       | ICE <i>clc</i> - $\Delta$ <i>mfsR</i> + mini-Tn7- <i>mfsR</i>                                                         | 3543-derivative complemented in trans with mini-Tn7- <i>mfsR</i> with its native promoter                       | (2)        | 4161      |                                  |
| <i>P. putida</i> UWC1       | ICE <i>clc</i> - $\Delta$ <i>mfsABC</i>                                                                               | 2737-derivative with deletion in <i>mfsABC</i> .                                                                | this study | 4165      | 120716 + 120717, 120718 + 129719 |
| <i>P. putida</i> UWC1       | ICE <i>clc</i> - $\Delta$ <i>mfsR</i>                                                                                 | 2737-derivative with a deletion of <i>mfsR</i> only                                                             | (2)        | 4322      |                                  |
| <i>P. putida</i> UWC1       | mini-Tn5-P <sub><i>mfsR</i>-11</sub> - <i>mcherry</i>                                                                 | Derivative of 1291 with single copy <i>mfsR</i> -11 promoter fragment fused to <i>mcherry</i>                   | this study | 3482-3487 |                                  |
| <i>P. putida</i> UWC1       | mini-Tn7- <i>mfsR</i> + mini-Tn5-P <sub><i>mfsR</i>-11</sub> - <i>mcherry</i>                                         | Derivative of 4301 with single copy <i>mfsR</i> - <i>mcherry</i> fusion                                         | this study | 4302-4307 |                                  |
| <i>P. putida</i> UWC1       | ICE <i>clc</i> wt + mini-Tn5-P <sub><i>mfsR</i>-11</sub> - <i>mcherry</i>                                             | Derivative of 2737 with single copy <i>mfsR</i> - <i>mcherry</i> fusion                                         | this study | 3497-3502 |                                  |
| <i>P. putida</i> UWC1       | ICE <i>clc</i> - $\Delta$ <i>mfsR</i> + mini-Tn5-P <sub><i>mfsR</i>-11</sub> - <i>mcherry</i>                         | Derivative of 3543 with single copy <i>mfsR</i> - <i>mcherry</i> fusion                                         | this study | 3606-3611 |                                  |
| <i>P. putida</i> UWC1       | ICE <i>clc</i> - $\Delta$ <i>mfsR</i> + mini-Tn7- <i>mfsR</i> + mini-Tn5-P <sub><i>mfsR</i>-11</sub> - <i>mcherry</i> | Derivative of 4161 with single copy <i>mfsR</i> - <i>mcherry</i> fusion                                         | this study | 4282-4287 |                                  |
| <i>P. putida</i> UWC1       | mini-Tn5-P <sub><i>mfsA</i>-6</sub> - <i>mcherry</i>                                                                  | Derivative of 1291 with single copy <i>mfsA</i> - <i>mcherry</i> fusion (fragment A-6)                          | this study | 4272-4277 |                                  |
| <i>P. putida</i> UWC1       | mini-Tn7- <i>mfsR</i> + mini-Tn5-P <sub><i>mfsA</i></sub> -                                                           | Derivative of 4301 with single copy                                                                             | this study | 4308-4313 |                                  |

|                             |                                                                                                       |                                                                                 |            |           |  |
|-----------------------------|-------------------------------------------------------------------------------------------------------|---------------------------------------------------------------------------------|------------|-----------|--|
|                             | 6- <i>mcherry</i>                                                                                     | <i>mfsA-mcherry</i> fusion                                                      |            |           |  |
| <i>P. putida</i> UWC1       | ICE <i>clc</i> wt + mini-Tn5-P <sub>mfsA-6</sub> - <i>mcherry</i>                                     | Derivative of 2737 with single copy <i>mfsA-mcherry</i> fusion                  | this study | 4254-4259 |  |
| <i>P. putida</i> UWC1       | ICE <i>clc</i> -Δ <i>mfsR</i> + mini-Tn5-P <sub>mfsA-6</sub> - <i>mcherry</i>                         | Derivative of 3543 with single copy <i>mfsA-mcherry</i> fusion                  | this study | 4260-4265 |  |
| <i>P. putida</i> UWC1       | ICE <i>clc</i> -Δ <i>mfsR</i> + mini-Tn7- <i>mfsR</i> + mini-Tn5-P <sub>mfsA-6</sub> - <i>mcherry</i> | Derivative of 4161 with single copy <i>mfsA-mcherry</i> fusion                  | this study | 4266-4271 |  |
| <i>P. putida</i> UWC1       | ICE <i>clc</i> wt + mini-Tn5-P <sub>mfsR-8</sub> - <i>mcherry</i>                                     | Derivative of 1291 with single copy <i>mfsR-mcherry</i> fusion (fragment R-8)   | this study | 4410-4413 |  |
| <i>P. putida</i> UWC1       | ICE <i>clc</i> -Δ <i>mfsR</i> + mini-Tn5-P <sub>mfsR-8</sub> - <i>mcherry</i>                         | Derivative of 3543 with single copy <i>mfsR-mcherry</i> fusion                  | this study | 4414-4417 |  |
| <i>P. putida</i> UWC1       | ICE <i>clc</i> -Δ <i>mfsR</i> + mini-Tn7- <i>mfsR</i> + mini-Tn5-P <sub>mfsR-8</sub> - <i>mcherry</i> | Derivative of 4161 with single copy <i>mfsR-mcherry</i> fusion                  | this study | 4418-4421 |  |
| <i>P. putida</i> UWC1       | mini-Tn5-P <sub>mfsR-8</sub> - <i>mcherry</i>                                                         | Derivative of 1291 with single copy <i>mfsR-mcherry</i> fusion                  | this study | 4402-4405 |  |
| <i>P. putida</i> UWC1       | mini-Tn7- <i>mfsR</i> + mini-Tn5-P <sub>mfsR-8</sub> - <i>mcherry</i>                                 | Derivative of 4301 with single copy <i>mfsR-mcherry</i> fusion                  | this study | 4406-4409 |  |
| <i>P. putida</i> UWC1       | mini-Tn5-P <sub>mfsR-9</sub> - <i>mcherry</i>                                                         | Derivative of 1291 with single copy <i>mfsR-mcherry</i> fusion (fragment R-9)   | this study | 4392-4395 |  |
| <i>P. putida</i> UWC1       | mini-Tn7- <i>mfsR</i> + mini-Tn5-P <sub>mfsR-9</sub> - <i>mcherry</i>                                 | with single copy <i>mfsR-mcherry</i> fusion                                     | this study | 4396-4399 |  |
| <i>P. putida</i> UWC1       | mini-Tn5-P <sub>mfsA-3</sub> - <i>mcherry</i>                                                         | with single copy <i>mfsA-mcherry</i> fusion                                     | this study | 4424-4427 |  |
| <i>P. putida</i> UWC1       | mini-Tn7- <i>mfsR</i> + mini-Tn5-P <sub>mfsA-3</sub> - <i>mcherry</i>                                 | with single copy <i>mfsA-mcherry</i> fusion                                     | this study | 4428-4431 |  |
| <i>P. putida</i> UWC1       | mini-Tn5-P <sub>mfsA-6</sub> rev- <i>mcherry</i>                                                      | with single copy <i>mfsA-mcherry</i> fusion                                     | this study | 4434-4437 |  |
| <i>P. putida</i> UWC1       | mini-Tn7- <i>mfsR</i> + mini-Tn5-P <sub>mfsA-6</sub> rev- <i>mcherry</i>                              | with single copy <i>mfsA-mcherry</i> fusion                                     | this study | 4438-4441 |  |
| <i>P. aeruginosa</i> PAO509 | ICE <i>clc</i>                                                                                        | PAO509 into which ICE <i>clc</i> was introduced by conjugation from strain 2737 | this study | 4731-4734 |  |
| <i>P. aeruginosa</i> PAO509 | ICE <i>clc</i> Δ <i>mfsABC</i>                                                                        | idem the <i>mfsABC</i> deletion mutant, using strain 4165 as donor              | this study | 4735-4748 |  |



|                             |                                     |                                                                  |            |           |  |
|-----------------------------|-------------------------------------|------------------------------------------------------------------|------------|-----------|--|
| <i>P. aeruginosa</i> PAO509 | ICE <i>clc</i> $\Delta$ <i>mfsR</i> | idem the <i>mfsR</i> deletion mutant, using strain 4322 as donor | this study | 4739-4742 |  |
|-----------------------------|-------------------------------------|------------------------------------------------------------------|------------|-----------|--|

Table S2. List of Primers used in this study

| primer number | sequence 5'-3'                     | Comment                                                                |
|---------------|------------------------------------|------------------------------------------------------------------------|
| 100208        | ATCATGATCGGGAGCGTTTACT             | FWD, ANNEALS AT THE END OF ORF18502, POSITION 18501                    |
| 100210        | GCTAGGGAATGTGCTATTCAAAG            | rev, anneals before the RBS of orf 18502, position 19254               |
| 101105        | GAATTCTGCTCCAGGACGGTGAACAA         | Fwd primer in the region upstream of orf18502                          |
| 101106        | CTCGAGGGCTGCTCCATTTGGTTTGACT       | Rev primer in the region upstream of orf18502                          |
| 101107        | CTCGAGGACTTGGTTAGTGC GTTGCATCT     | Fwd primer in the region downstream of orf18502                        |
| 101108        | GGATCCGCAGTGCAGAGTTCCTTTTAGAG      | Rev primer in the region downstream of orf18502                        |
| 110705        | TTTTCATATGCAGATGCAACGCACTA         | Fwd primer to clone orf18502 into pET22b for His-tagging.              |
| 110706        | TTTTCTCGAGTGATCGGGAGCGTTTAC        | Rev primer to clone orf18502 into pET22b for His-tagging.              |
| 120204        | TTTTTTCTAGAGACCCTCATTACATCGACATGAC | Rev primer promoter region ORF 85934-88400                             |
| 120222        | TTTTGGATCCCCACCTTCGTCGGTGCAATTC    | flank orf18502+native promoter, adds a BamH1 site                      |
| 120512        | TTTTGGATCCAGCAGCGGTTGTGACGTCAT     | Rev primer for intergenic region upstream of orf32963                  |
| 120513        | TTTTTCTAGAGGAGCTGATGGATGGATGA      | Fwd primer for intergenic region upstream of orf32963                  |
| 120203        | TTTTTGGATCCGGACGGGCTCCTTGAAAAG     | Fwd primer promoter region ORF 85934-88400                             |
| 120716        | TTTTTCTAGACTGCCTTTGCCGATGC         | Fwd primer from 32204 of ICElc, amplifying upstream of orf32963        |
| 120717        | GAAAGTTCACCAATATACGAATAG           | Rev primer from 32968 of ICElc, amplifying upstream of orf32963        |
| 120718        | ACTAGTCGCCATTCGTCCAGCATG           | Fwd primer from 37118 of ICElc, amplifying upstream of orf36077        |
| 120719        | TTTTGGATCCAATGGCCACCCCATAG         | Rev primer from 37813 of ICElc, amplifying upstream of orf36077        |
| 120824        | ATGACTTGGTTAGTGC GTTGCAT           | Fwd1, to amplify the intergenic region upstream of orf18502 for EMSA.  |
| 120825        | TCACAAGTCGATATAAGCAATGCG           | Rev1, to amplify the intergenic region upstream of orf18502 for EMSA.  |
| 120826        | CGCATTGCTTATATCGACTTGTA            | Fwd2, to amplify the intergenic region upstream of orf18502 for EMSA   |
| 120827        | GGCAGGAATGAACTGCGCC                | Rev2, to amplify the intergenic region upstream of orf18502 for EMSA . |
| 120828        | GGCGCAGTTCATTCTGCC                 | Fwd3, to amplify the intergenic region upstream of orf18502 for EMSA . |
| 120829        | TGCCTGCCAATCTCGGCATCTC             | Rev3, to amplify the intergenic region upstream of orf18502 for EMSA . |
| 120830        | AAGAGCTGCTGCGACAGCAG               | Fwd4, to amplify the intergenic region upstream of orf18502 for EMSA . |
| 120831        | CCACCTTCGTCCGGTCAATTC              | Rev4, to amplify the intergenic region upstream of orf18502 for EMSA . |
| 120832        | CGCTTCAACTTTGAATAGCAC              | Fwd5, to amplify the intergenic region upstream of orf18502 for EMSA . |
| 120833        | CACGCTGGTGTACCGAAT                 | Rev5, to amplify the intergenic region upstream of orf18502 for EMSA . |
| 121102        | GTCAAACCAACCACGCCGC                | Fwd primer to produce fragm A or B if used with 120512 or 121103       |
| 121103        | GGTTTGACATAAAAAGAAAAG              | Rev primer to produce fragm B if used with 121102                      |
| 121104        | TTGACACAACGCCCCGAAATCGGT           | Fwd primer to produce fragm C or E if used with 121103 or 120512       |
| 121105        | AACACCCCAAGCAGGTGCGA               | Rev primer to produce fragm D if used with primer 120513               |
| 121106        | TTTTCTCGAGGCTTCATCTAGGCCCTTGT      | Rev primer to produce the upper part of fragm XI                       |

|        |                                  |                                                                                        |
|--------|----------------------------------|----------------------------------------------------------------------------------------|
|        |                                  | (without operator) with primer 121107                                                  |
| 121107 | TTGGCGTTCAGCTCGCCGCTGCT          | Fwd primer to produce fragm X or XI                                                    |
| 121108 | TTTCTCGAGCGCTTCAACTTTGAATAGCAC   | Fwd primer to produce the lower part of fragm XI (without operator) with primer 121109 |
| 121109 | GTGCCATAGCGCAATTAAGA             | Rev primer to produce fragm X or XI                                                    |
| 121211 | TTTTGGATCCATGACTTGTTAGTGCGTTGCAT | Fwd to produce "Fragm X or XI" into pJAMA39                                            |
| 121212 | TTTTTCTAGAGTGCCATAGCGCAATTAAGA   | Rev to produce "Fragm X or XI" into pJAMA39                                            |
| 121213 | TTTTTCTAGACCACCTTCGTCGGTGCAATTC  | Rev to produce "Fragm XII" into pJAMA39 (use with 121211)                              |
| 121214 | TTTTTCTAGAGTCAAACCAACCACGCCGC    | Fwd to produce "Fragm A" into pJAMA39 (use with 120512)                                |

Table S3. MIC values for *P. putida* UWC1 (ICE*clc*),  $\Delta$ *mfsR*, and  $\Delta$ *mfsABC* mutants

| Substance               | <i>P. putida</i> (ICE <i>clc</i> ) |       |       |       | <i>P. putida</i> (ICE <i>clc</i> - $\Delta$ <i>mfsR</i> ) |       |       |       | <i>P. putida</i> (ICE <i>clc</i> - $\Delta$ <i>mfsABC</i> ) |       |       |       |
|-------------------------|------------------------------------|-------|-------|-------|-----------------------------------------------------------|-------|-------|-------|-------------------------------------------------------------|-------|-------|-------|
|                         | MHB <sup>a</sup>                   |       | 3CBA  |       | MHB                                                       |       | 3CBA  |       | MHB                                                         |       | 3CBA  |       |
|                         | Exp 1                              | Exp 2 | Exp 1 | Exp 2 | Exp 1                                                     | Exp 2 | Exp 1 | Exp 2 | Exp 1                                                       | Exp 2 | Exp 1 | Exp 2 |
| 3-chlorobenzoate        | 19.6 <sup>b</sup>                  |       |       |       | 39.1                                                      |       |       |       | 19.6                                                        |       |       |       |
| 2-aminophenol           | 0.43                               |       |       |       | 0.43                                                      |       |       |       | 0.43                                                        |       |       |       |
| 4-chlorophenol          | 0.4                                |       |       |       | 0.4                                                       |       |       |       | 0.2                                                         |       |       |       |
| Ethidium bromide        | 0.63                               |       |       |       | 0.31                                                      |       |       |       | 0.63                                                        |       |       |       |
| Ciprofloxacin           | 0.064                              | 0.03  | 0.06  | 2     | 0.125                                                     | 0.03  | 0.25  | 0.25  | 0.064                                                       | 0.06  | 0.06  | 0.5   |
| Tetracycline            | 1                                  | 1     | 1     |       | 2                                                         | 1     | 0.5   |       | 2                                                           | 0.5   | 1     |       |
| Gentamycin              | 0.12                               |       | 0.12  |       | 0.06                                                      |       | 0.06  |       | 0.06                                                        |       | 0.12  |       |
| Chloramphenicol         | 64                                 |       | >256  |       | 64                                                        |       | >256  |       | 128                                                         |       | >256  |       |
| Piperacillin+Tazobactam | 8                                  |       | 16    | 64    | 16                                                        |       | 32    | 32    | 16                                                          |       | 16    | 64    |
| Meropenem               | 0.25                               |       | 0.25  |       | 1                                                         |       | 0.5   |       | 1                                                           |       | 0.5   |       |
| Erythromycin            | 64                                 |       | 16    |       | 128                                                       |       | 8     |       | 64                                                          |       | 16    |       |
| Aztreonam               | 8                                  |       | >64   |       | 32                                                        |       | 32    |       | 32                                                          |       | 64    |       |
| Imipenem                | 0.25                               |       | 1     |       | <0.125                                                    |       | 1     |       | <0.125                                                      |       | 1     |       |
| Ofloxacin               | 0.25                               |       | 0.5   | 4     | 0.25                                                      |       | 1     | 1     | 0.25                                                        |       | 0.5   | 1     |
| Trimetoprim             | >256                               |       | >256  |       | >256                                                      |       | >256  |       | >256                                                        |       | >256  |       |
| Ceftazidime             | 2                                  |       | 4     |       | 2                                                         |       | 4     |       | 2                                                           |       | 4     |       |
| Sparfloxacin            |                                    |       |       | 4     |                                                           |       |       | 0.5   |                                                             |       |       | 2     |
| Trovafloxacin           |                                    |       |       | 1     |                                                           |       |       | 0.25  |                                                             |       |       | 0.5   |
| Moxifloxacin            |                                    |       |       | 8     |                                                           |       |       | 1     |                                                             |       |       | 4     |
| Levofloxacin            |                                    |       |       | 2     |                                                           |       |       | 1     |                                                             |       |       | 2     |

a) culture medium for test: MHB, Muller-Hinton broth; 3CBA, minimal medium with 3-chlorobenzoate (10 mM).

b) all concentrations in mg/ml

Table S4. MIC values for *P. aeruginosa* PAO1, PAO509 and ICE*clc* derivatives

| Strain                                       | Triclosan (mg/L) | Chromium (III) chloride hexahydrate (mg/L) |
|----------------------------------------------|------------------|--------------------------------------------|
| PAO509-ICE <i>clc</i> WT                     | 16 ± 0           | 1250                                       |
| PAO509-ICE <i>clc</i> $\Delta$ <i>mfsABC</i> | 10 ± 4           | 1250                                       |
| PAO509-ICE <i>clc</i> $\Delta$ <i>mfsR</i>   | 5 ± 2            | 1250                                       |
| PAO1                                         | >1024            | ND                                         |
| PAO509                                       | 16               | 625                                        |

1. **McClure NC, Weightman AJ, Fry JC.** 1989. Survival of *Pseudomonas putida* UWC1 containing cloned catabolic genes in a model activated-sludge unit. Appl. Environ. Microbiol. **55**:2627-2634.
2. **Pradervand N, Sulser S, Delavat F, Miyazaki R, Lamas I, van der Meer JR.** 2014. An operon of three transcriptional regulators controls horizontal gene transfer of the Integrative and Conjugative Element ICE*clc* in *Pseudomonas knackmussii* B13. PLoS Genet. **10**:e1004441.
3. **Sentchilo V, Czechowska K, Pradervand N, Minoia M, Miyazaki R, van der Meer JR.** 2009. Intracellular excision and reintegration dynamics of the ICE*clc* genomic island of *Pseudomonas knackmussii* sp. strain B13. Mol. Microbiol. **72**:1293-1306.
